# Supplementary material for: Encapsulation of the Hoveyda–Grubbs 2nd generation catalyst in magnetically separable alginate/mesoporous carbon beads for olefin metathesis reactions in water
Source: Royal Society of Chemistry journal article supplement (doi:10.1039/d2re00058j), 2022-01-01
Supplement: d2re00058j1.pdf [file d2re00058j1.pdf]

## SUPPORTING INFORMATION

### Encapsulation of Hoveyda-Grubbs 2<sup>nd</sup> Generation Catalyst in Magnetically Separable Alginate/Mesoporous Carbon Beads for Olefin Metathesis Reactions in Water

Zeynep Tunalı,<sup>[a]</sup> Kutay Sağdıç<sup>[b]</sup>, Fatih İnci<sup>[b,c]</sup> and Bengi Özgün Öztürk<sup>\*[a]</sup>

[a] Z. Tunalı, Assoc. Prof. Dr. B. Ö. Öztürk  
Hacettepe University, Faculty of Science, Chemistry Department, 06800, Beytepe-Ankara, TURKEY  
E-mail: bengi04@hacettepe.edu.tr

[b],[c] K. Sağdıç, and Asst. Prof. Dr. F. İnci  
UNAM—National Nanotechnology Research Center, Bilkent University, 06800 Ankara, TURKEY  
Institute of Materials Science and Nanotechnology, Bilkent University, 06800, Ankara, TURKEY

|                                                                                                                                                        |   |
|--------------------------------------------------------------------------------------------------------------------------------------------------------|---|
| <b>Figure S 1.</b> HR-TEM images of as-received mesoporous carbon .....                                                                                | 1 |
| <b>Figure S 2.</b> Particle size distribution of mesoporous carbon.....                                                                                | 1 |
| <b>Figure S 3.</b> N <sub>2</sub> adsorption/desorption isotherm of mesoporous carbon.....                                                             | 2 |
| <b>Figure S 4.</b> FTIR spectrum of Alg@γ-Fe <sub>2</sub> O <sub>3</sub> @HG2@MC .....                                                                 | 2 |
| <b>Figure S 5.</b> XPS survey of Alg@γ-Fe <sub>2</sub> O <sub>3</sub> @HG2@MC.....                                                                     | 3 |
| <b>Figure S 6.</b> Magnetization curve for Alg@γ-Fe <sub>2</sub> O <sub>3</sub> @HG2@MC.....                                                           | 3 |
| <b>Figure S 7.</b> Alginate beads; Alg@γ-Fe <sub>2</sub> O <sub>3</sub> @HG2@MC, a) Dried under vacuum oven b)<br>Freshly prepared alginate beads..... | 4 |
| <b>Figure S 8.</b> Alginate beads in in aqueous reaction mixture.....                                                                                  | 4 |
| <b>Figure S 9.</b> The performance of the catalyst in RCM of diethyldiallyl malonate after storage<br>on benchtop under air atmosphere.....            | 5 |
| <b>Table 1.</b> RCM reactions at different reaction temperatures.....                                                                                  | 6 |

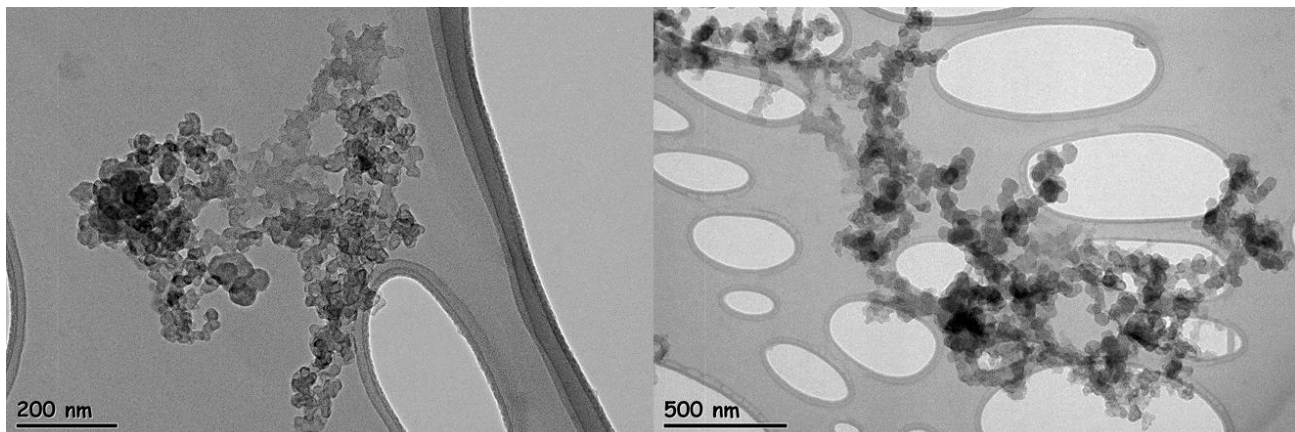

**Figure S 1.** HR-TEM images of as-received mesoporous carbon

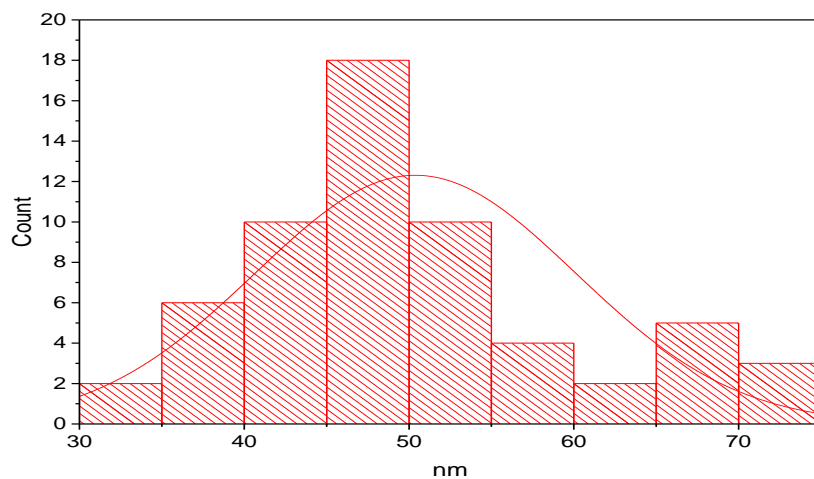

**Figure S 2.** Particle size distribution of mesoporous carbon

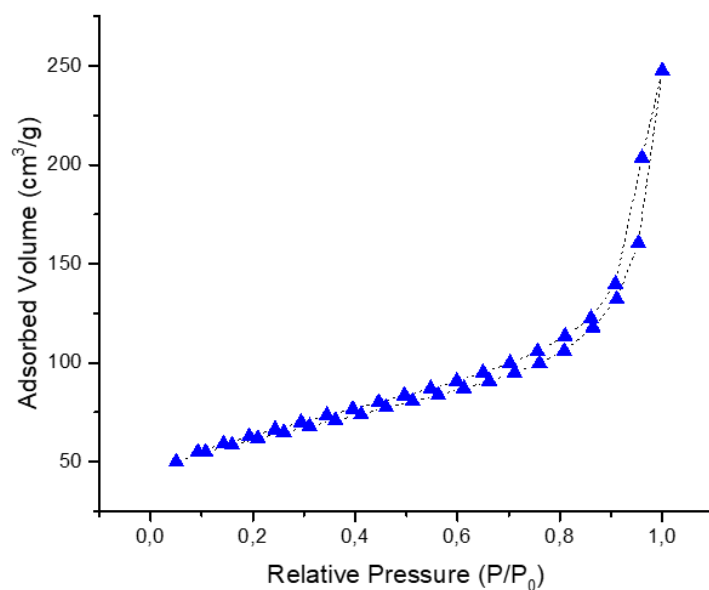

| Surface Area (m <sup>2</sup> /g) | Pore Volume (cm <sup>3</sup> /g) | Pore Size (nm) |
|----------------------------------|----------------------------------|----------------|
| 206                              | 0.66                             | 4.00           |

**Figure S 3.** N<sub>2</sub> adsorption/desorption isotherm of mesoporous carbon

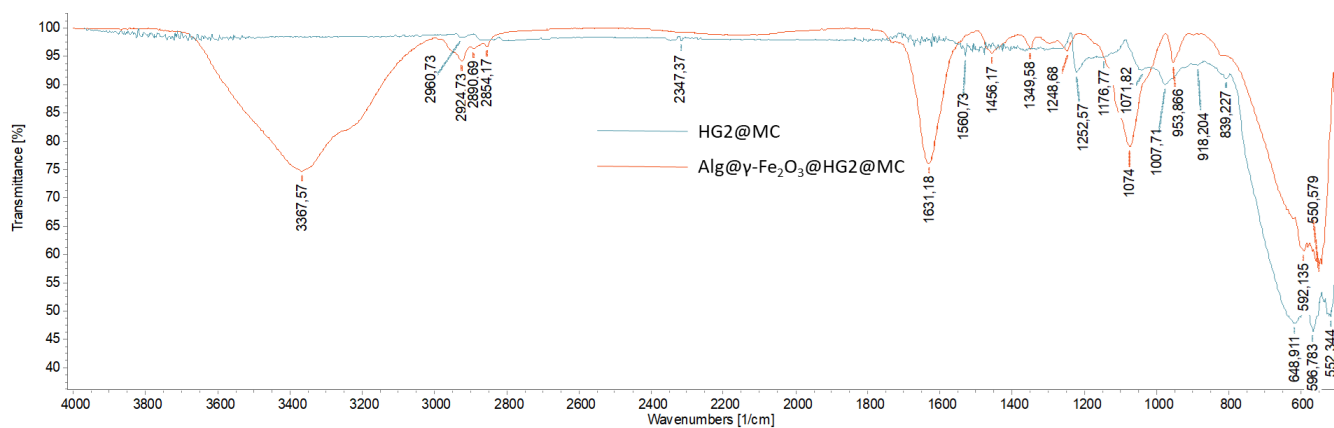

**Figure S 4.** FTIR spectrum of Alg@γ-Fe<sub>2</sub>O<sub>3</sub>@HG2@MC

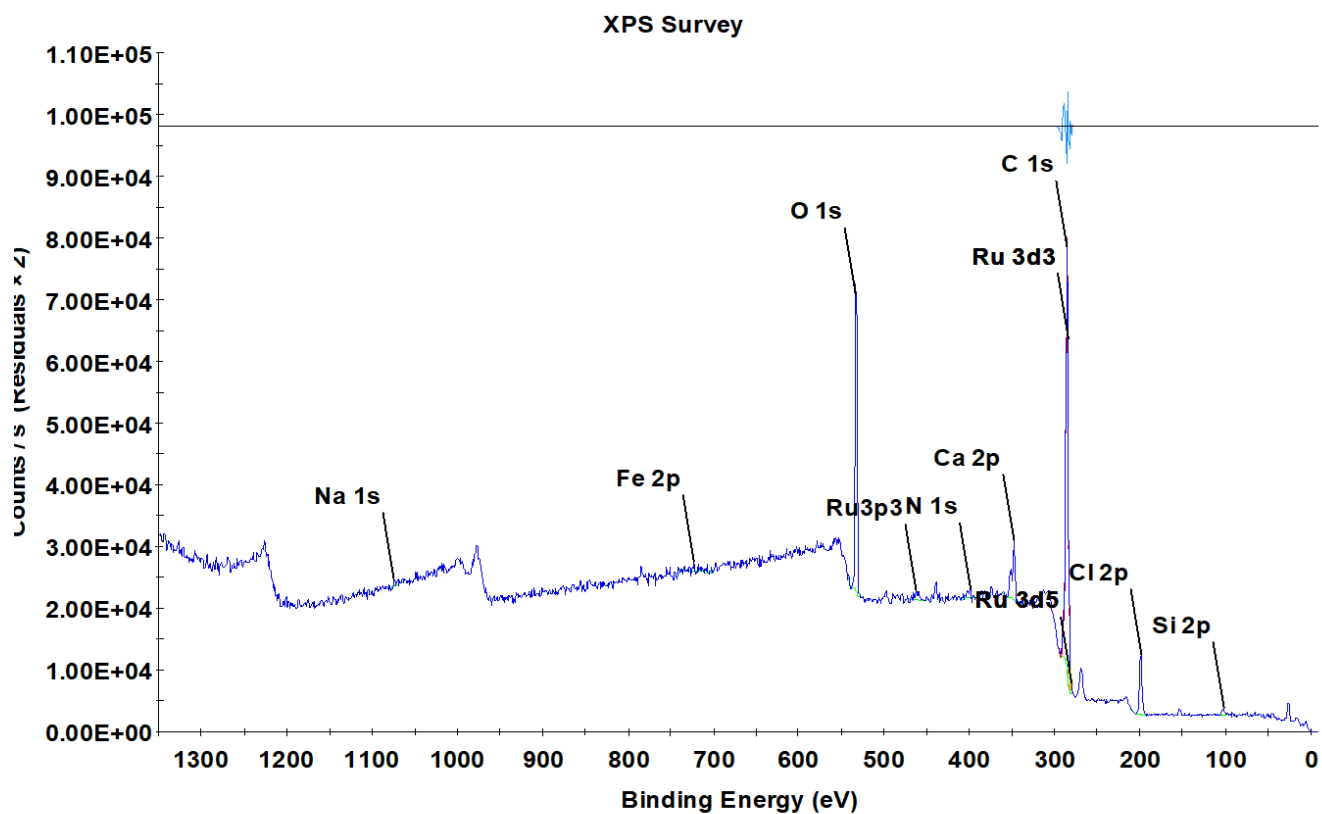

**Figure S 5.** XPS survey of Alg@ $\gamma$ -Fe<sub>2</sub>O<sub>3</sub>@HG2@MC

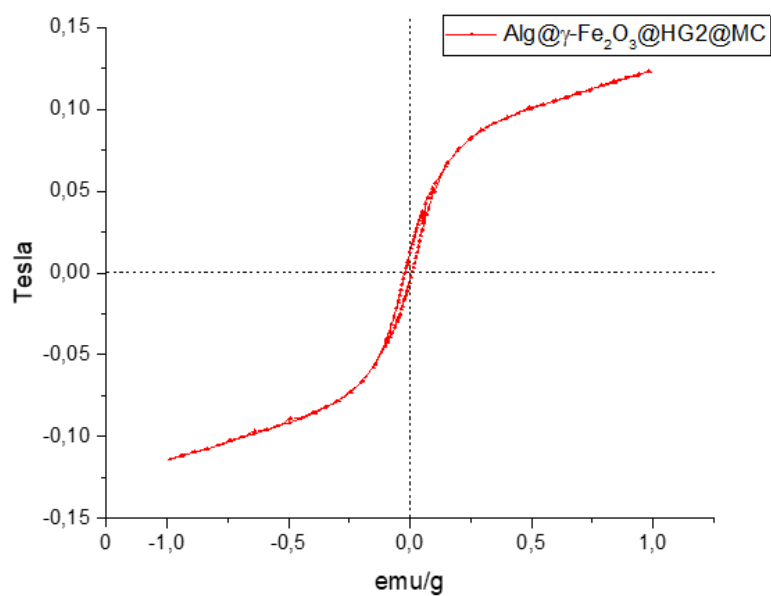

**Figure S 6.** Magnetization curve for Alg@ $\gamma$ -Fe<sub>2</sub>O<sub>3</sub>@HG2@MC

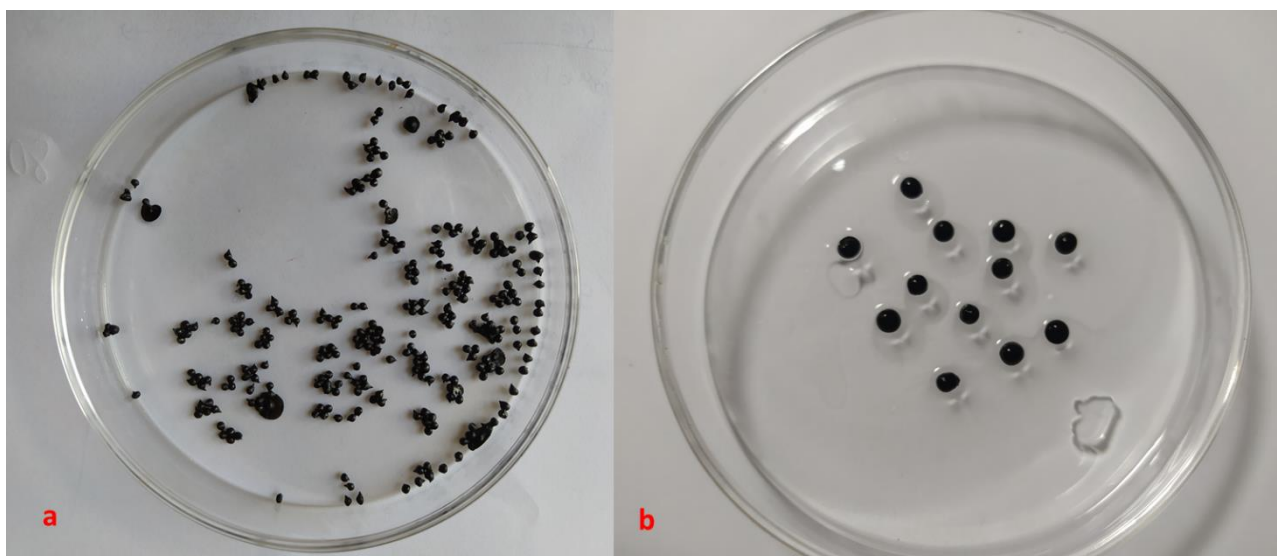

**Figure S 7.** Alginate beads; Alg@ $\gamma$ -Fe<sub>2</sub>O<sub>3</sub>@HG2@MC, a) Dried under vacuum oven b) Freshly prepared alginate beads

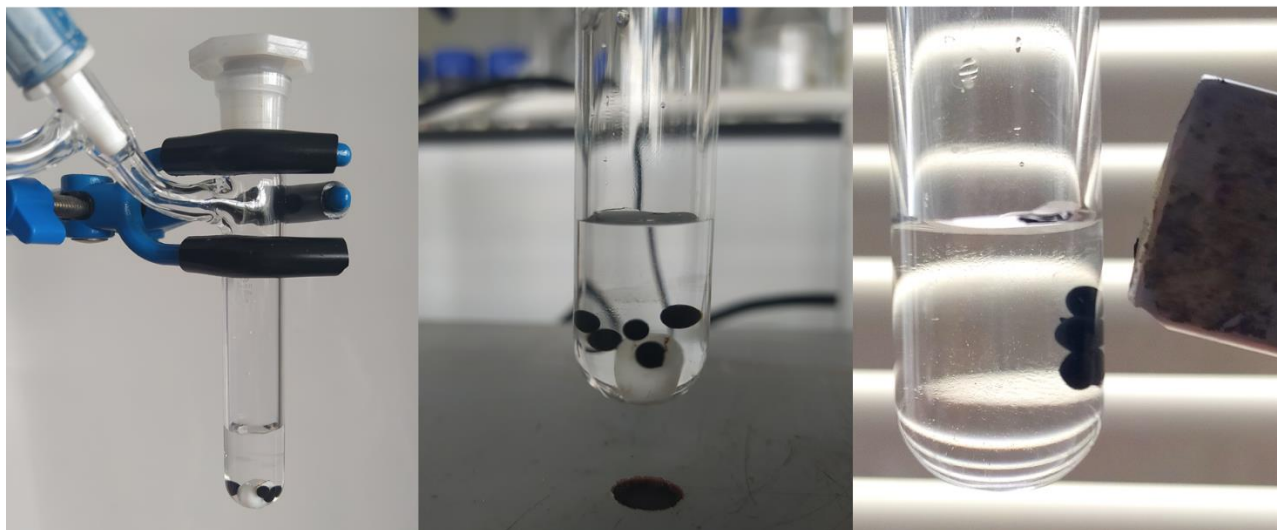

**Figure S 8.** Alginate beads in in aqueous reaction mixture

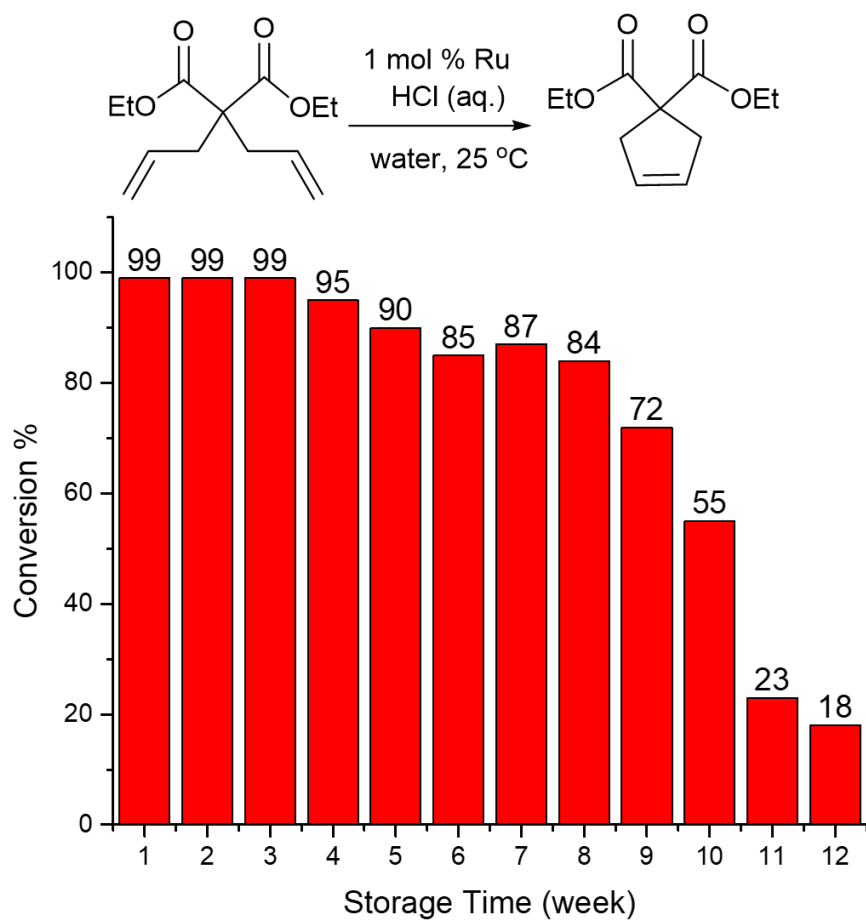

**Figure S 9.** The performance of the catalyst in RCM of diethyldiallyl malonate after storage on benchtop under air atmosphere

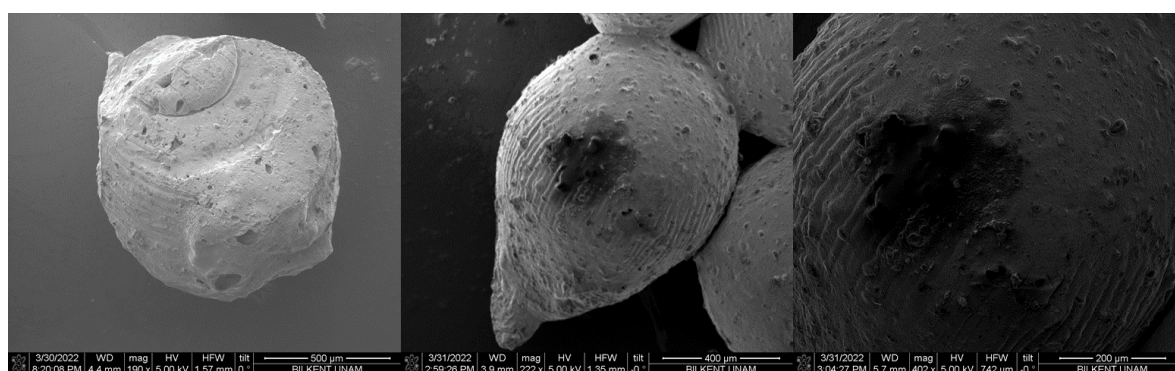

**Figure S 10.** SEM images of the catalyst bead after 1<sup>st</sup> run

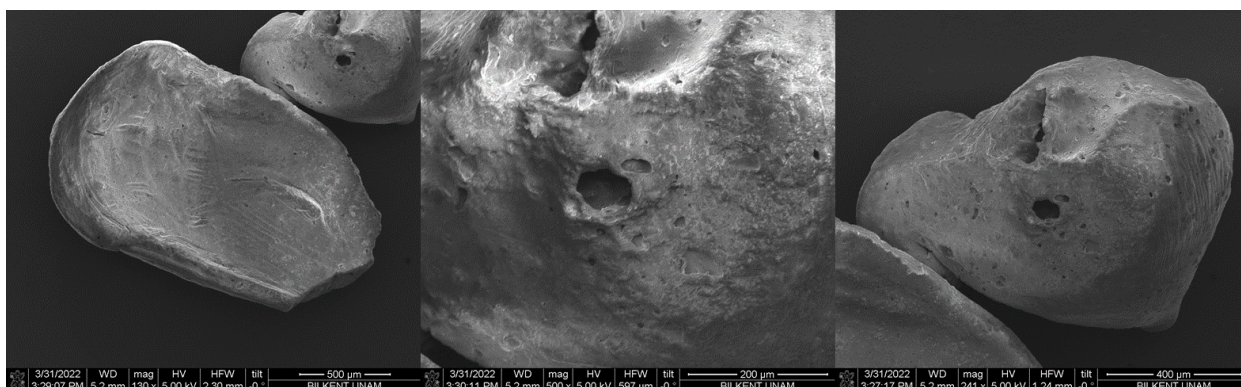

**Figure 11.** SEM images of the catalyst bead after 7<sup>th</sup> run

**Table 1.** RCM reactions at different reaction temperatures

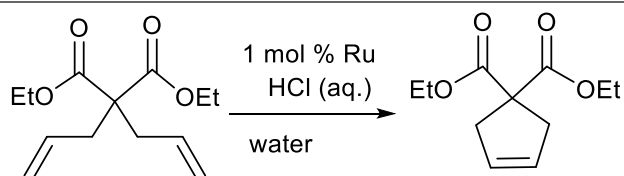

| Entry <sup>a</sup> | Temperature ( °C) | Time (h) | Conversion % |
|--------------------|-------------------|----------|--------------|
| 1                  | 25                | 1        | 99           |
| 2                  | 60                | 24       | 40           |
| 3                  | 4                 | 24       | 60           |

a: aqueous HCl ( 1M) solution was used in RCM reactions with a HCl/Ru (mol/mol) ratio of 10/1.
